# Supplementary material
Source: publisher site journal article supplement (https://www.dovepress.com/article/401550)
Supplement: Supplementary file 1 [file get_supplementary_file.php]

Giuseppe Ventriglia et al.

**SUPPLEMENTARY MATERIALS**

**Figure 1S**. Prescribing habits of GPs with more than 20 years of medical practice and GPs with less than 20 years in managing patients with MSK pain.


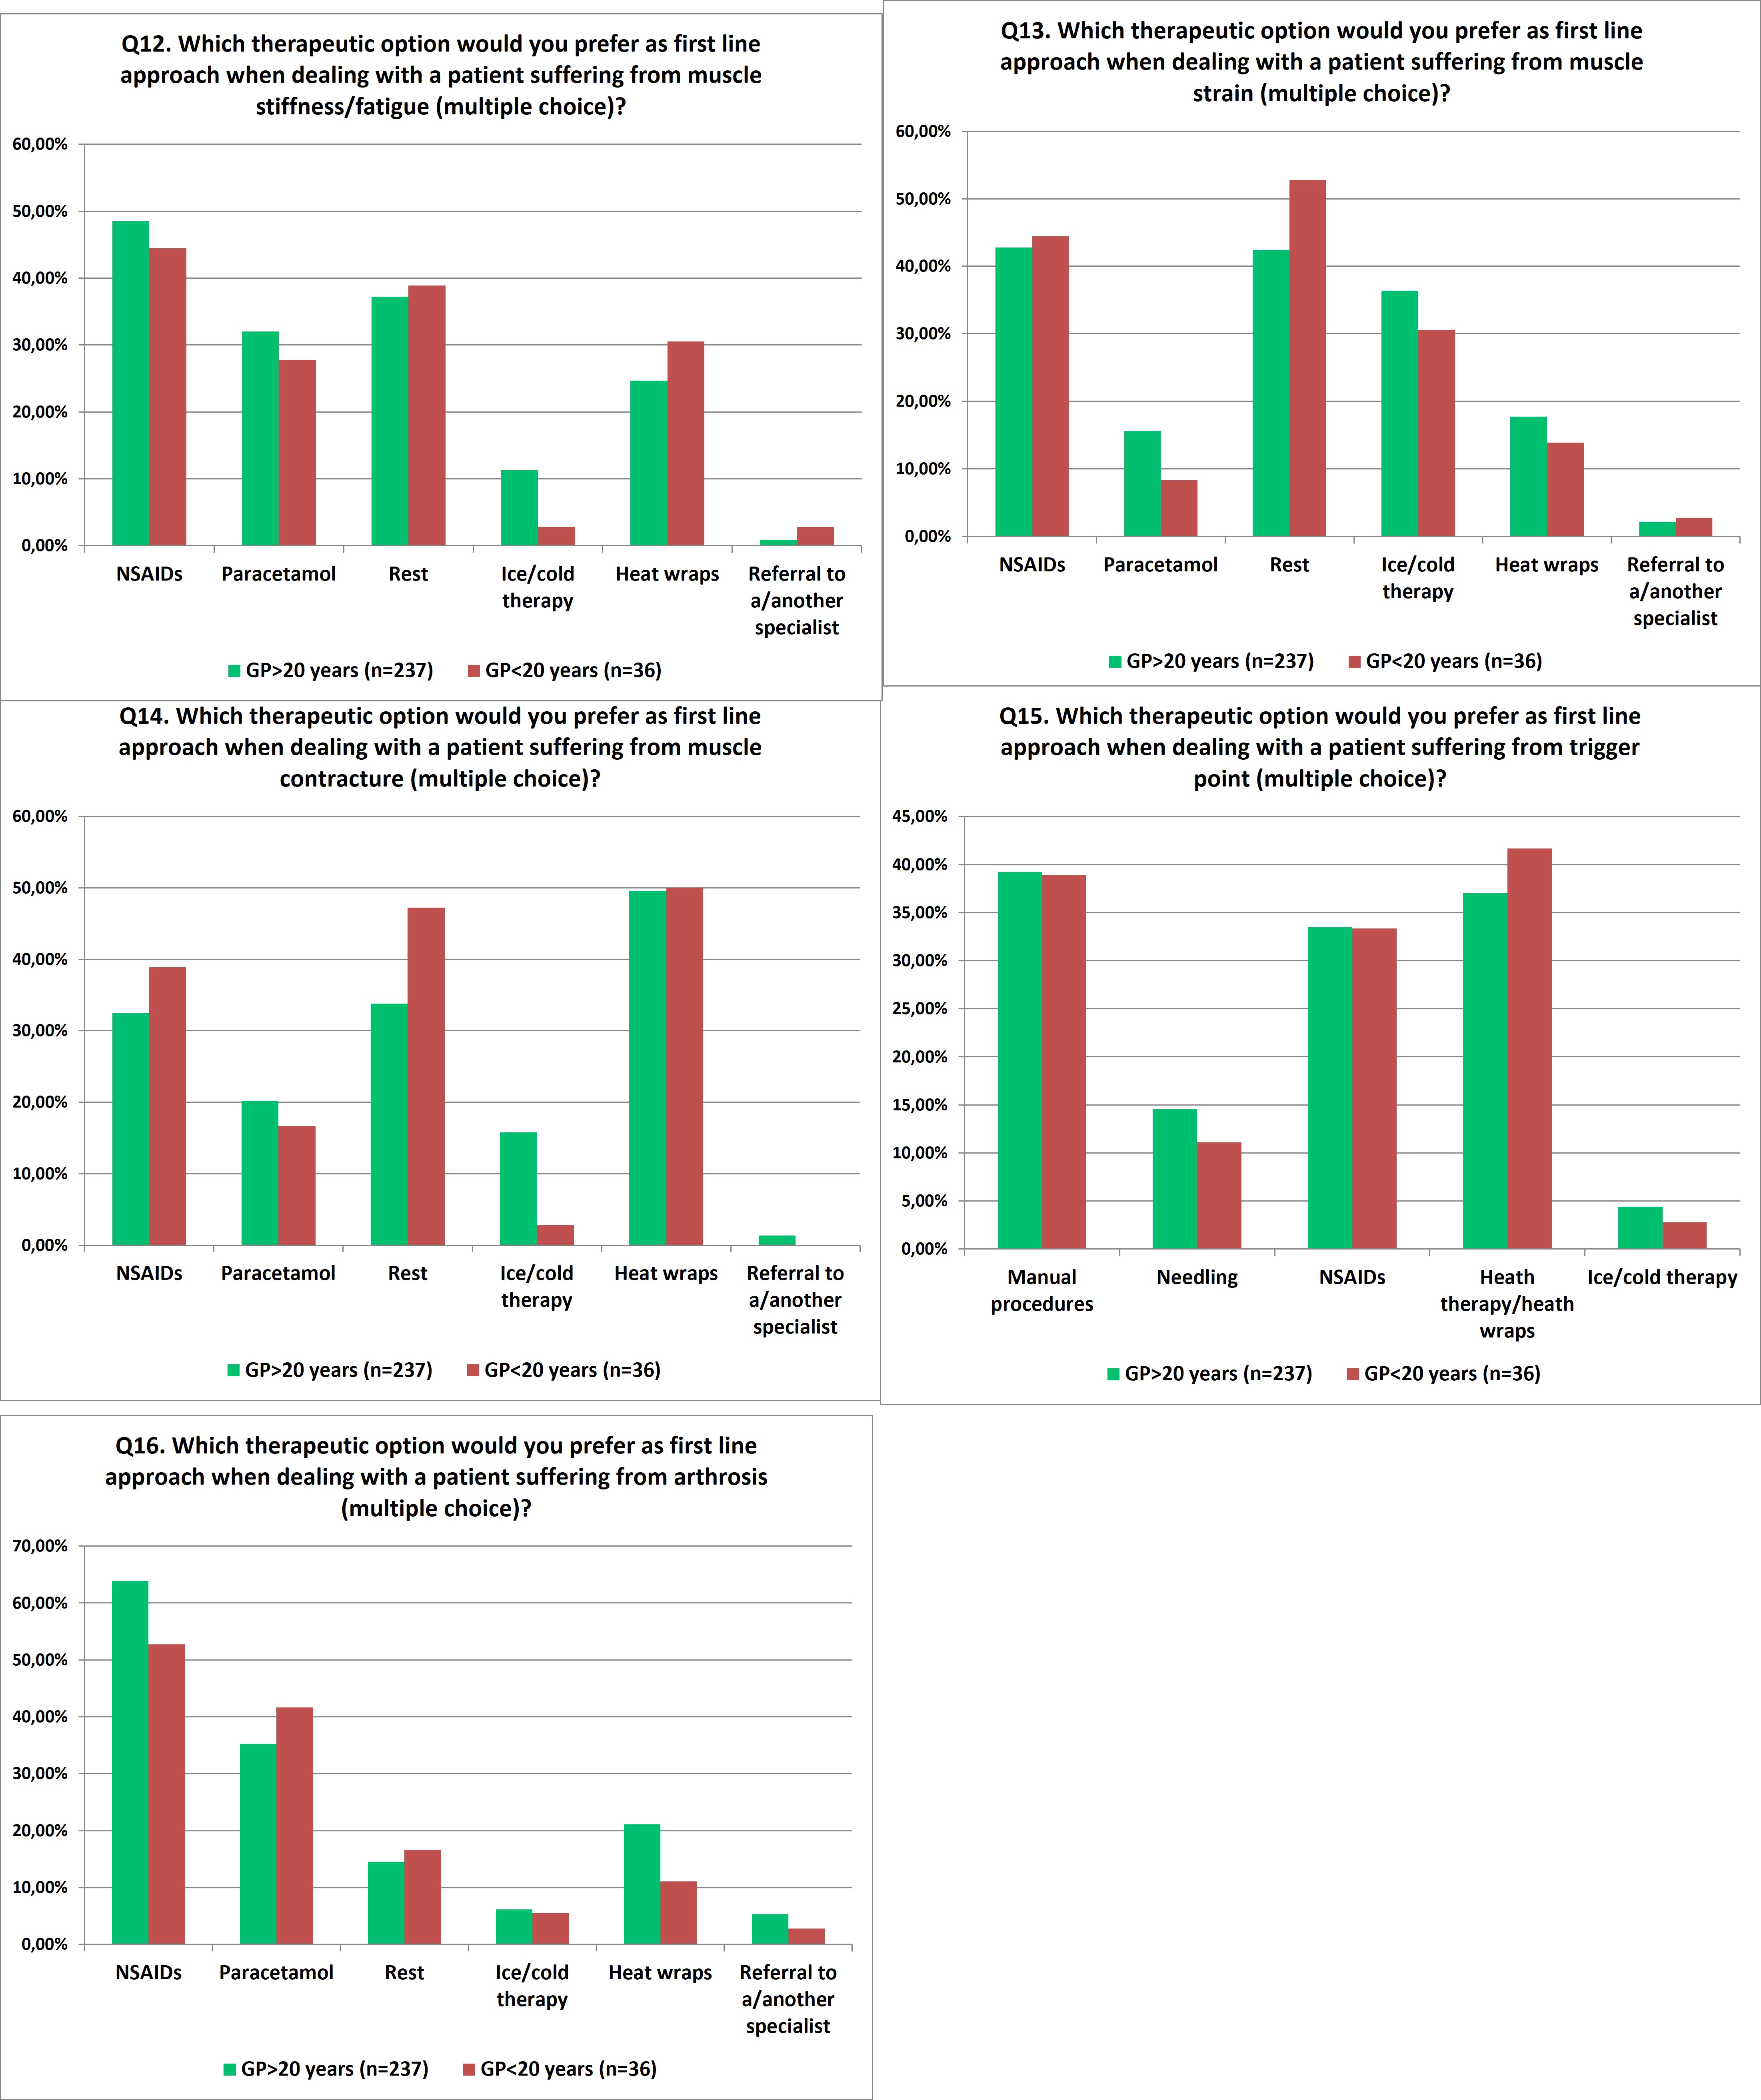


**Figure 2S**. Prescribing habits of GPs and specialists managing patients suffering from arthrosis (Q16).


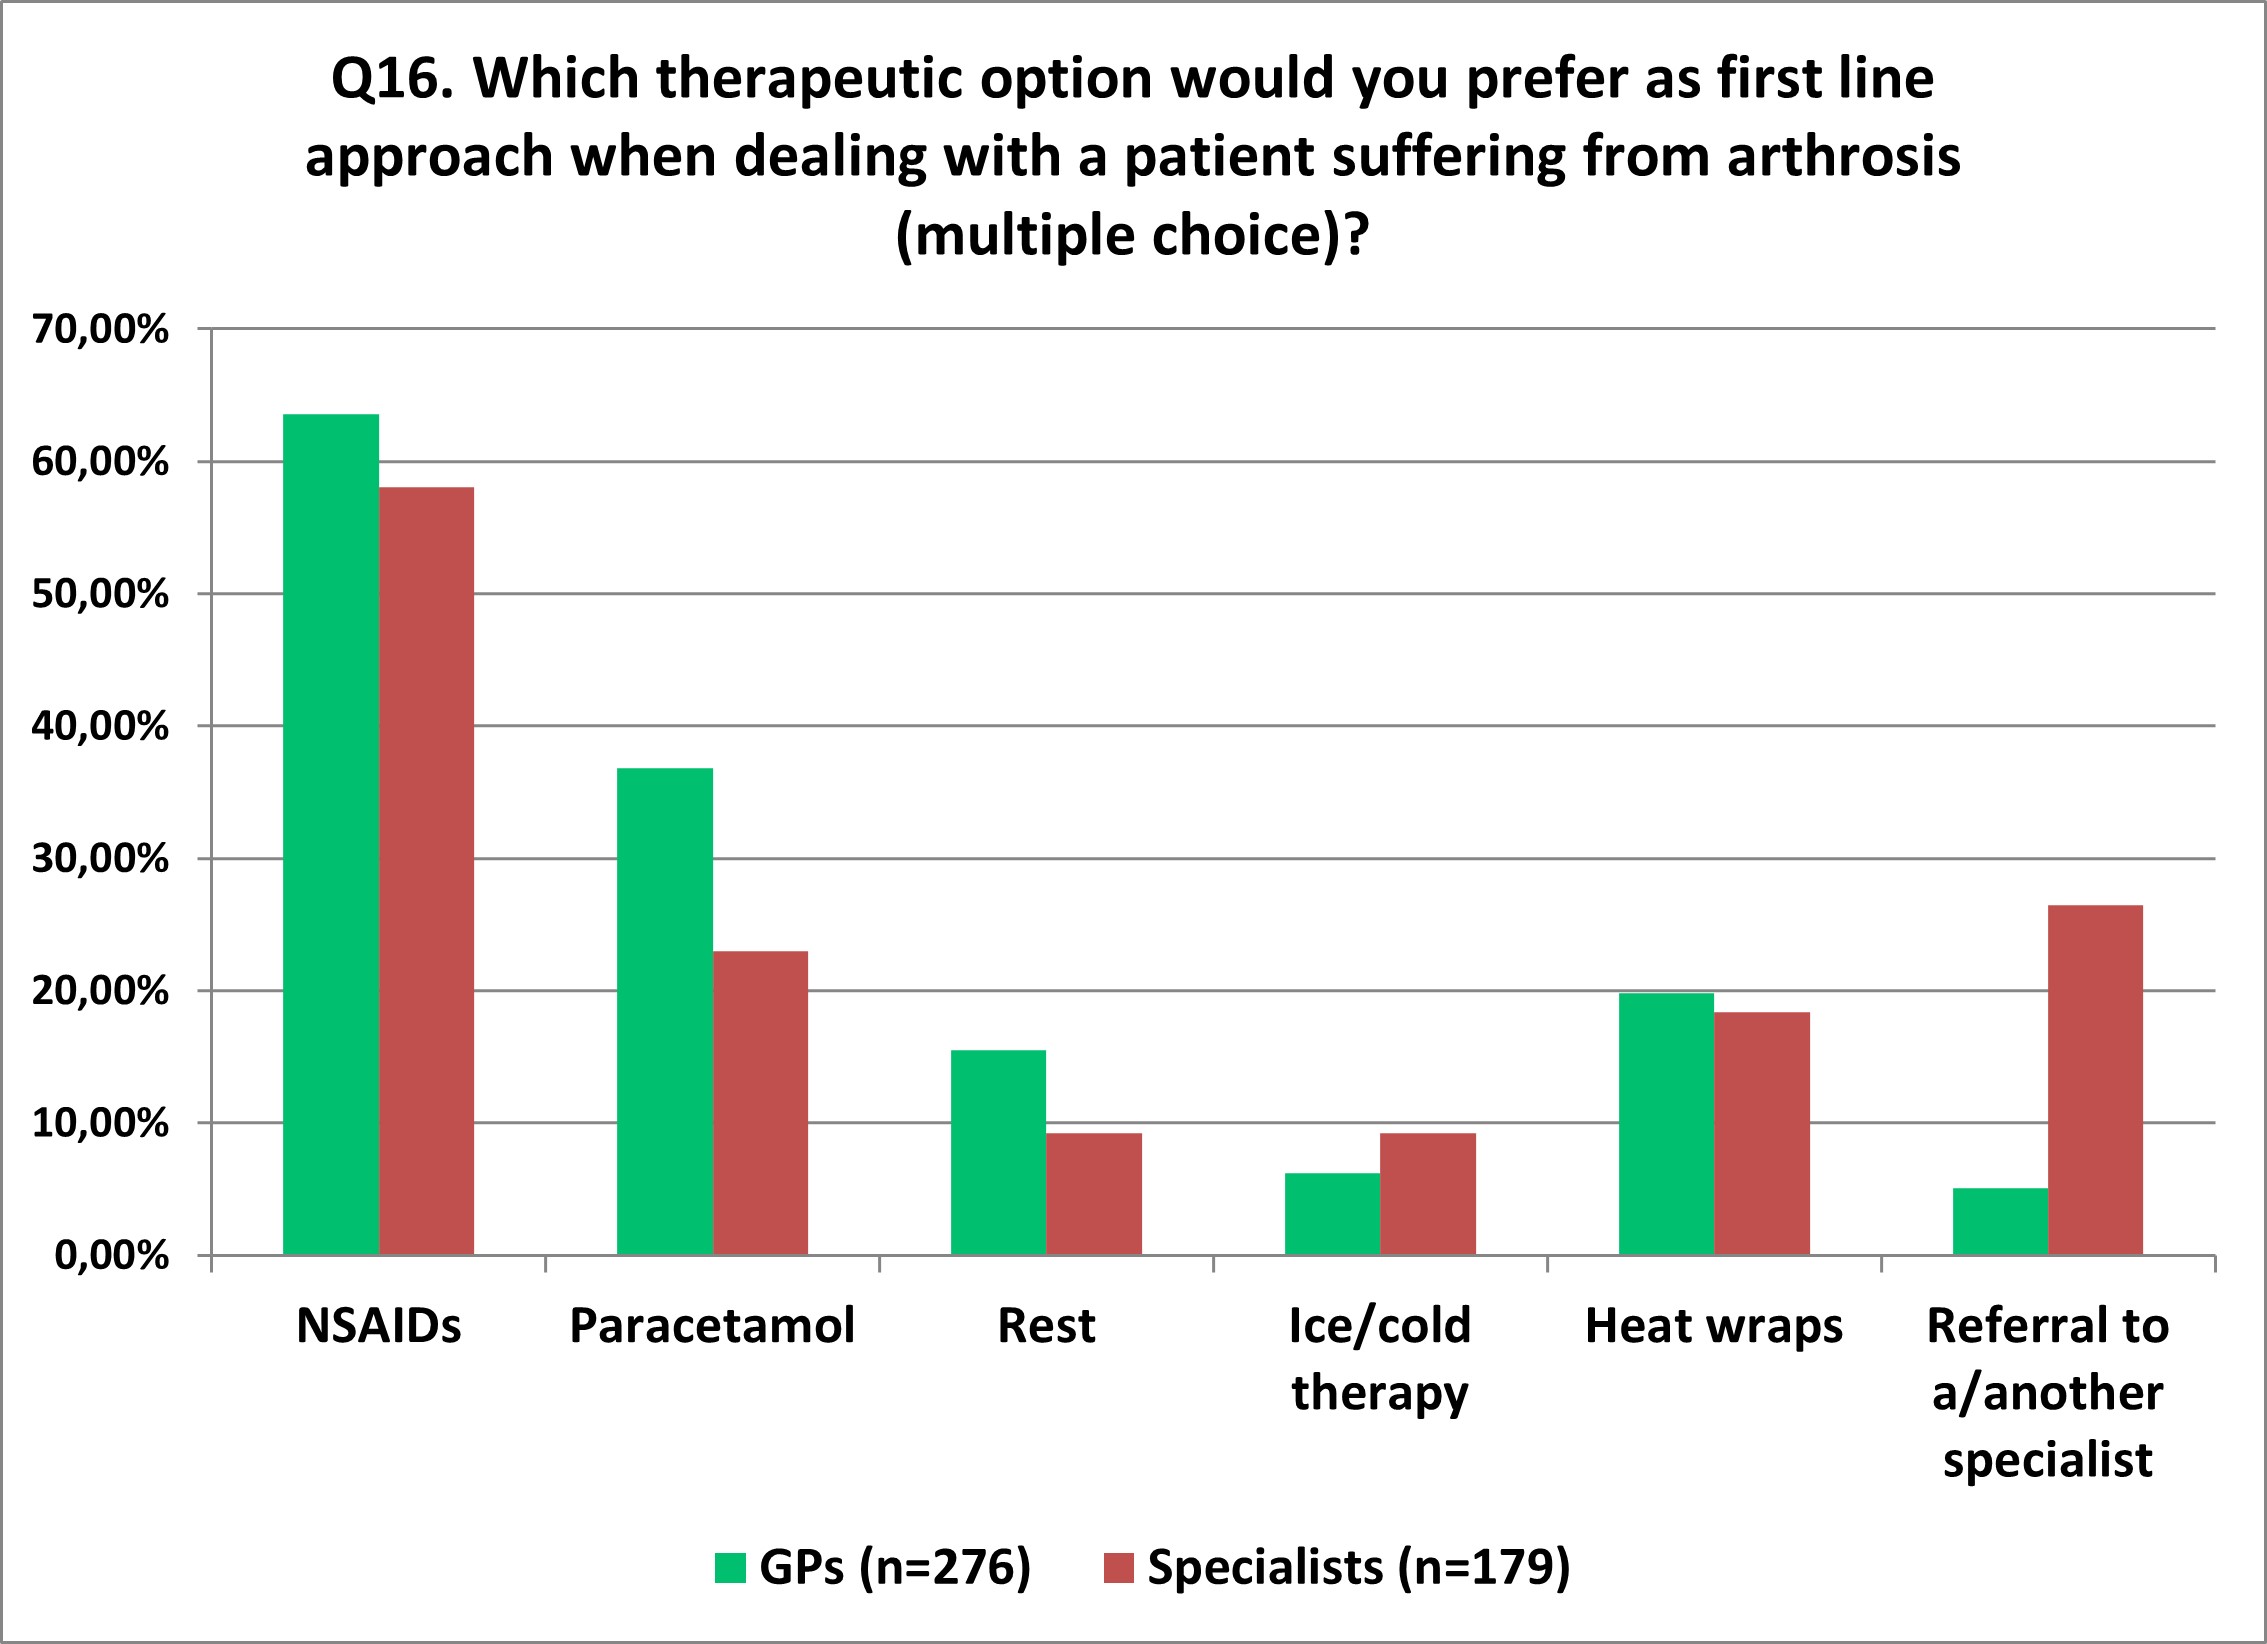


***Survey questionnaire***

**Demographic Items**

**Q1: Please indicate your specialization**:

Q1a: family medicine

Q1b: sport medicine

Q1c: physiatry

**Q2: Please indicate your working geographical area?**

Q2a: Northern Italy

Q2b: Central

Q2c: Southern Italy (including Islands, namely Sicily and Sardinia)

**Q3: Please indicate how many years of medical practice did you spend as healthcare professional**:

Q3a: < 5 years

Q3b: 5-10 years

Q3c: 10-20 years

Q3d: > 20 years

**Clinical profile of the patients encountered by the participant physicians in their daily practice**

**Q4: How much frequently do patients suffering from musculoskeletal pain refer to your attention?**

Q4a: never

Q4b: rarely/sometimes

Q4c: often

Q4d: always

**Q5: The patients referring to you because of their musculoskeletal pain are:**

Q5a: mostly patients who were already self-medicated

Q5b: mostly patients who have already trialed one or more analgesic medications

Q5c: resembling answer Q5a and Q5b in the same proportion

Q5d: is not always possible to define such patients

**Q6: Based on your clinical experience, please list the three most frequent anatomical sites patients commonly reported as sites of pain**

Q6a: Lumbar area

Q6b: Cervical area

Q6c: Thoracic area

Q6d: Knee

Q6e: Neck

Q6f: Shoulder

Q6g: Hip

Q6h: Hand

Q6i: Arm

Q6j: Wrist

Q6k: Ankle/foot

Q6l: localized to a muscle

**Q7: The patients referring to you because of their musculoskeletal pain suffer from**:

Q7a: very frequently acute pain

Q7b: very frequently chronic pain

Q7c: a pain resembling answer Q7a and Q7b in the same proportion

**Q8: Which type of pain is mostly reported by your patients with musculoskeletal pain?**

Q8a: mechanical

Q8b: inflammatory

Q8c: neuropathic

Q8d: mixed

Q8e: is not always possible to define such patients

**Q9: Please indicate the most frequent cause of musculoskeletal pain as reported by your patients**

Q9a: arthrosis

Q9b: incorrect posture

Q9c: demanding work

Q9d: intense/prolonged physical exercise

Q9e: trauma (e.g., sprain)

Q9f: lesion (e.g., muscle strain)

**Q10: Based on your clinical experience and your perception, which age group more frequently refers to you because of a MSK pain of traumatic origin?**

Q10a: 14-18 years

Q10b: 18-40 years

Q10c: 40-65 years

Q10d: > 65 years

**Q11: Based on your clinical experience and your perception, which age group more frequently refers to you because of a MSK pain of non-traumatic origin?**

Q11a: 14-18 years

Q11b: 18-40 years

Q11c: 40-65 years

Q11d: > 65 years

**Therapeutic approach and prescribing habits of physicians when dealing with patients with musculoskeletal pain**

**Q12: Please indicate which therapeutic option would you prefer as first line approach when dealing with a patient suffering from muscle stiffness/fatigue:**

Q12a: non-steroidal anti-inflammatory drugs (NSAIDs)

Q12b: paracetamol

Q12c: rest

Q12d: ice/cold therapy

Q12e: heat wraps

Q12f: referral to a/another specialist

**Q13: Please indicate which therapeutic option would you prefer as first line approach when dealing with a patient suffering from muscle strain:**

Q13a: non-steroidal anti-inflammatory drugs (NSAIDs)

Q13b: paracetamol

Q13c: rest

Q13d: ice/cold therapy

Q13e: heat wraps

Q13f: referral to a/another specialist

**Q14: Please indicate which therapeutic option would you prefer as first line approach when dealing with a patient suffering from muscle contracture:**

Q14a: non-steroidal anti-inflammatory drugs (NSAIDs)

Q14b: paracetamol

Q14c: rest

Q14d: ice/cold therapy

Q14e: heat wraps

Q14f: referral to a/another specialist

**Q15: Please indicate which therapeutic option would you prefer as first line approach when dealing with a patient suffering from trigger point:**

Q15a: manual procedures

Q15b: needling

Q15c: non-steroidal anti-inflammatory drugs (NSAIDs)

Q15d: Heath therapy/heath wraps

Q15e: Ice/cold therapy

**Q16: Please indicate which therapeutic option would you prefer as first line approach when dealing with a patient suffering from arthrosis:**

Q16a: non-steroidal anti-inflammatory drugs (NSAIDs)

Q16b: paracetamol

Q16c: rest

Q16d: ice/cold therapy

Q16e: heat wraps

Q16f: referral to a/another specialist

**Physician attitude and beliefs about the use of thermotherapy in musculoskeletal pain management**

**Q17: Please rate your degree of agreement/disagreement with the following statement: “The thermotherapy can be of help after having treated traumatic pain with ice/cold application for 48-72h”**

Q17a: I disagree

Q17b: it depends on specific circumstances

Q17c: I much agree

Q17d: I fully agree

**Q18: Based on your clinical experience in musculoskeletal pain management by using heat wraps, please indicate in which attitude you most recognize yourself:**

Q18a: I use heat wraps rarely in patients with comorbidities

Q18b: I use heat wraps in combination with pharmacological and non-pharmacological treatments

Q18c: I use the heat wraps in monotherapy

**Q19: Based on your clinical experience, please evaluate the efficacy/usefulness of thermotherapy in managing patients with musculoskeletal pain:**

Q19a: None

Q19b: Poor

Q19c: Enough

Q19d: Much

Q19e: I do not know

**Q20: Please select which are the benefits you most confer to thermotherapy:**

Q20a: Pain relief

Q20b: Increased connective tissue elasticity

Q20c: Increased blood flow and local tissue metabolism
Q20d: Placebo effect

Q20e: All of the above

**Q21: Please rate your degree of agreement/disagreement with the following statement: “The heat is indicated for muscular pain, even chronic, because it stretches the muscles and helps the rest, also by modifying pain perception”**

Q21a: I disagree

Q21b: it depends on specific circumstances

Q21c: I much agree

Q21d: I fully agree

**Q22: Please indicate how often you would recommend your patients with musculoskeletal pain the use of heat wraps:**

Q22a: Never

Q22b: Sometimes

Q22c: Often

Q22d: Very often
